# Supplementary material
Source: Research Square preprint supplement (doi:10.21203/rs.3.rs-9774750/v1)
Supplement: Supplementary file 1 [file b8d6461345b996cf66d4e0a5.docx]

Supplementary Material

| **Diagnosis** | **ICD-10 Codes** |
| --- | --- |
| Lung cancer | C34 |
| Brain metastases | C7932, C7931, C7940, C7949 |
| Steroid use | Z7951, Z7952 |
| Immunosuppressant use | Z7962, Z7960, Z7961, Z7969 |
| HIV infection | B20 |
| Chronic hepatitis | B18 |
| Neutropenia | D701, D702, D703, D708, D709 |
| Lymphopenia | D72.810 |
| Hypogammaglobulinemia | D801, D802, D803, D804, D808, D809 |
| Bone marrow transplant | Z9481, Z9484 |
| Protein energy malnutrition | E45, E46, E42, E43, E440, E44, E441 |
| Diabetes mellitus | E10, E11, E118, E1121, E1140, E1069, E1040, E1021, E921, E0821, E08311, E08319, E083551, E083552, E083553, E0836, E0840, E0869 |
| Chronic kidney disease | N18X |
| End stage renal disease | N186 |
| Liver disease | K70, Q898, Q446, I820, R160, K7460, K710, K711, K7110, K7111, K712, K713, K714, K715, K7150, K7151, K716, K717, K718, K719, K760, K761, K762, K763, K764, K765, K766, K767, K768, K7681, K7689, K769 |
| Congestive heart failure | I0981, I50 |
| Alcohol use | F101, F1010, F1011, F1012, F10120, F10121, F10129, F1014, F1015, F10150, F10151, F10159, F1018, F10180, F10181, F10182, F10188, F1019, F102, F1020, F1021, F1022, F10220, F10221, F10229, F1023, F10230, F10231, F10232, F10239, F1024, F1025, F10250, F10251, F10259, F1026, F1027, F1028, F10280, F10281, F10282, F10288, F1029, F10920, F10921, F10929, F1094, F1095, F10950, F10951, F10959, F1096, F1097, F1098, F10980, F10981, F10982, F10988, F1099 |
| Smoking | Z87891, F17200, F17201, F17203, F17208, F17200, F17209, F17210, F17211, F17213, F17218, F17219, F17220, F17221, F17223, F17228, F17229, F17290, F17291, F17293, F17298, F17299, Z720 |
